# Supplementary material for: New C-Terminal Conserved Regions of Tafazzin, a Catalyst of Cardiolipin Remodeling
Source: Oxid Med Cell Longev. 2019 Oct 24;2019:2901057. doi: 10.1155/2019/2901057 (PMC6855050; doi:10.1155/2019/2901057)
Supplement: Supplementary Materials — Table S1: the sheet “species” covers the distribution of identified unconventional isoforms of tafazzin among 125 mammalian species that have an ortholog of the human tafazzin (GeneID 6901) according to Entrez Gene database [37]. Column 1 indicates taxon ID in NCBI taxonomy database [38]. Column 2 shows a brief species taxonomy within the order of mammals; column 3, species scientific name; columns T1, T2, and E5, numbers of the corresponding tafazzin isoforms identified. The sheets T1, T2, and E5 list the corresponding isoforms identified. In these sheets, column 1 indicates protein ID in RefSeq; columns 2 and 3 replicate those from the “species” sheet; column 4 specifies the isoform number; asterisk in column 5 indicates proteins used in the logo generation (Figure 2). The last column presents the protein regions. The central part in sheet E5 contains hominid proteins where E5 was previously identified elsewhere. [file 2901057.f1.xlsx]

## Sheet: species
tax_id	lineage	species	T1	T2	E5
185453	Eutheria; Afrotheria; Chrysochloridae; Chrysochlorinae	Chrysochloris asiatica	0	0	0
28737	Eutheria; Afrotheria; Macroscelidea; Macroscelididae	Elephantulus edwardii	0	0	0
9785	Eutheria; Afrotheria; Proboscidea; Elephantidae	Loxodonta africana	4	0	0
127582	Eutheria; Afrotheria; Sirenia; Trichechidae	Trichechus manatus latirostris	0	0	0
9371	Eutheria; Afrotheria; Tenrecidae; Tenrecinae	Echinops telfairi	0	0	0
1230840	Eutheria; Afrotheria; Tubulidentata; Orycteropodidae	Orycteropus afer afer	0	0	0
482537	Eutheria; Euarchontoglires; Dermoptera; Cynocephalidae	Galeopterus variegatus	0	0	0
9986	Eutheria; Euarchontoglires; Glires; Lagomorpha; Leporidae	Oryctolagus cuniculus	0	0	0
9978	Eutheria; Euarchontoglires; Glires; Lagomorpha; Ochotonidae	Ochotona princeps	0	0	0
51338	Eutheria; Euarchontoglires; Glires; Rodentia; Castorimorpha; Castoridae	Castor canadensis	0	0	0
10020	Eutheria; Euarchontoglires; Glires; Rodentia; Castorimorpha; Heteromyidae; Dipodomyinae	Dipodomys ordii	0	0	0
885580	Eutheria; Euarchontoglires; Glires; Rodentia; Hystricomorpha; Bathyergidae	Fukomys damarensis	0	0	0
10181	Eutheria; Euarchontoglires; Glires; Rodentia; Hystricomorpha; Bathyergidae	Heterocephalus glaber	2	0	0
10141	Eutheria; Euarchontoglires; Glires; Rodentia; Hystricomorpha; Caviidae	Cavia porcellus	0	0	0
34839	Eutheria; Euarchontoglires; Glires; Rodentia; Hystricomorpha; Chinchillidae	Chinchilla lanigera	0	0	0
10160	Eutheria; Euarchontoglires; Glires; Rodentia; Hystricomorpha; Octodontidae	Octodon degus	0	0	0
51337	Eutheria; Euarchontoglires; Glires; Rodentia; Myomorpha; Dipodoidea; Dipodidae; Dipodinae	Jaculus jaculus	0	0	0
79684	Eutheria; Euarchontoglires; Glires; Rodentia; Myomorpha; Muroidea; Cricetidae; Arvicolinae	Microtus ochrogaster	0	0	0
10029	Eutheria; Euarchontoglires; Glires; Rodentia; Myomorpha; Muroidea; Cricetidae; Cricetinae	Cricetulus griseus	0	0	0
10036	Eutheria; Euarchontoglires; Glires; Rodentia; Myomorpha; Muroidea; Cricetidae; Cricetinae	Mesocricetus auratus	0	0	0
230844	Eutheria; Euarchontoglires; Glires; Rodentia; Myomorpha; Muroidea; Cricetidae; Neotominae	Peromyscus maniculatus bairdii	0	0	0
10047	Eutheria; Euarchontoglires; Glires; Rodentia; Myomorpha; Muroidea; Muridae; Gerbillinae	Meriones unguiculatus	0	0	0
10089	Eutheria; Euarchontoglires; Glires; Rodentia; Myomorpha; Muroidea; Muridae; Murinae	Mus caroli	0	0	0
10090	Eutheria; Euarchontoglires; Glires; Rodentia; Myomorpha; Muroidea; Muridae; Murinae	Mus musculus	0	0	0
10093	Eutheria; Euarchontoglires; Glires; Rodentia; Myomorpha; Muroidea; Muridae; Murinae	Mus pahari	0	0	0
10116	Eutheria; Euarchontoglires; Glires; Rodentia; Myomorpha; Muroidea; Muridae; Murinae	Rattus norvegicus	0	0	0
1026970	Eutheria; Euarchontoglires; Glires; Rodentia; Myomorpha; Muroidea; Spalacidae; Spalacinae	Nannospalax galili	3	0	1
43179	Eutheria; Euarchontoglires; Glires; Rodentia; Sciuromorpha; Sciuridae; Xerinae; Marmotini	Ictidomys tridecemlineatus	0	0	0
93162	Eutheria; Euarchontoglires; Glires; Rodentia; Sciuromorpha; Sciuridae; Xerinae; Marmotini	Marmota flaviventris	0	0	0
9994	Eutheria; Euarchontoglires; Glires; Rodentia; Sciuromorpha; Sciuridae; Xerinae; Marmotini	Marmota marmota marmota	0	0	0
9999	Eutheria; Euarchontoglires; Glires; Rodentia; Sciuromorpha; Sciuridae; Xerinae; Marmotini	Urocitellus parryii	1	0	1
9531	Eutheria; Euarchontoglires; Primates; Haplorrhini; Catarrhini; Cercopithecidae; Cercopithecinae	Cercocebus atys	2	0	0
60711	Eutheria; Euarchontoglires; Primates; Haplorrhini; Catarrhini; Cercopithecidae; Cercopithecinae	Chlorocebus sabaeus	2	0	0
9541	Eutheria; Euarchontoglires; Primates; Haplorrhini; Catarrhini; Cercopithecidae; Cercopithecinae	Macaca fascicularis	1	0	1
9544	Eutheria; Euarchontoglires; Primates; Haplorrhini; Catarrhini; Cercopithecidae; Cercopithecinae	Macaca mulatta	0	0	0
9545	Eutheria; Euarchontoglires; Primates; Haplorrhini; Catarrhini; Cercopithecidae; Cercopithecinae	Macaca nemestrina	0	0	0
9568	Eutheria; Euarchontoglires; Primates; Haplorrhini; Catarrhini; Cercopithecidae; Cercopithecinae	Mandrillus leucophaeus	0	0	0
9555	Eutheria; Euarchontoglires; Primates; Haplorrhini; Catarrhini; Cercopithecidae; Cercopithecinae	Papio anubis	0	0	0
9565	Eutheria; Euarchontoglires; Primates; Haplorrhini; Catarrhini; Cercopithecidae; Cercopithecinae	Theropithecus gelada	0	0	0
336983	Eutheria; Euarchontoglires; Primates; Haplorrhini; Catarrhini; Cercopithecidae; Colobinae	Colobus angolensis palliatus	0	0	0
61621	Eutheria; Euarchontoglires; Primates; Haplorrhini; Catarrhini; Cercopithecidae; Colobinae	Rhinopithecus bieti	1	0	1
61622	Eutheria; Euarchontoglires; Primates; Haplorrhini; Catarrhini; Cercopithecidae; Colobinae	Rhinopithecus roxellana	2	0	0
9593	Eutheria; Euarchontoglires; Primates; Haplorrhini; Catarrhini; Hominidae	Gorilla gorilla gorilla	0	0	0
9606	Eutheria; Euarchontoglires; Primates; Haplorrhini; Catarrhini; Hominidae	Homo sapiens	0	0	0
9597	Eutheria; Euarchontoglires; Primates; Haplorrhini; Catarrhini; Hominidae	Pan paniscus	0	0	0
9598	Eutheria; Euarchontoglires; Primates; Haplorrhini; Catarrhini; Hominidae	Pan troglodytes	0	0	0
9601	Eutheria; Euarchontoglires; Primates; Haplorrhini; Catarrhini; Hominidae	Pongo abelii	0	0	0
61853	Eutheria; Euarchontoglires; Primates; Haplorrhini; Catarrhini; Hylobatidae	Nomascus leucogenys	0	0	0
37293	Eutheria; Euarchontoglires; Primates; Haplorrhini; Platyrrhini; Aotidae	Aotus nancymaae	0	0	0
9483	Eutheria; Euarchontoglires; Primates; Haplorrhini; Platyrrhini; Cebidae; Callitrichinae; Callithrix	Callithrix jacchus	0	0	0
1737458	Eutheria; Euarchontoglires; Primates; Haplorrhini; Platyrrhini; Cebidae; Cebinae	Cebus capucinus imitator	0	0	0
27679	Eutheria; Euarchontoglires; Primates; Haplorrhini; Platyrrhini; Cebidae; Saimiriinae	Saimiri boliviensis	0	0	0
1868482	Eutheria; Euarchontoglires; Primates; Haplorrhini; Tarsiiformes; Tarsiidae	Carlito syrichta	0	0	0
30608	Eutheria; Euarchontoglires; Primates; Strepsirrhini; Lemuriformes; Cheirogaleidae	Microcebus murinus	0	0	0
379532	Eutheria; Euarchontoglires; Primates; Strepsirrhini; Lemuriformes; Indriidae	Propithecus coquereli	0	0	0
30611	Eutheria; Euarchontoglires; Primates; Strepsirrhini; Lorisiformes; Galagidae	Otolemur garnettii	0	0	0
246437	Eutheria; Euarchontoglires; Scandentia; Tupaiidae	Tupaia chinensis	1	0	1
286419	Eutheria; Laurasiatheria; Carnivora; Caniformia; Canidae	Canis lupus dingo	0	0	0
9615	Eutheria; Laurasiatheria; Carnivora; Caniformia; Canidae	Canis lupus familiaris	0	0	0
9627	Eutheria; Laurasiatheria; Carnivora; Caniformia; Canidae	Vulpes vulpes	0	0	0
391180	Eutheria; Laurasiatheria; Carnivora; Caniformia; Mustelidae; Lutrinae	Enhydra lutris kenyoni	0	0	0
9669	Eutheria; Laurasiatheria; Carnivora; Caniformia; Mustelidae; Mustelinae	Mustela putorius furo	0	0	0
9708	Eutheria; Laurasiatheria; Carnivora; Caniformia; Odobenidae	Odobenus rosmarus divergens	0	1	0
34884	Eutheria; Laurasiatheria; Carnivora; Caniformia; Otariidae	Callorhinus ursinus	1	0	1
34886	Eutheria; Laurasiatheria; Carnivora; Caniformia; Otariidae	Eumetopias jubatus	1	0	1
9704	Eutheria; Laurasiatheria; Carnivora; Caniformia; Otariidae	Zalophus californianus	2	0	0
9713	Eutheria; Laurasiatheria; Carnivora; Caniformia; Phocidae	Leptonychotes weddellii	0	1	0
29088	Eutheria; Laurasiatheria; Carnivora; Caniformia; Phocidae	Neomonachus schauinslandi	2	1	0
9646	Eutheria; Laurasiatheria; Carnivora; Caniformia; Ursidae	Ailuropoda melanoleuca	4	0	0
9643	Eutheria; Laurasiatheria; Carnivora; Caniformia; Ursidae	Ursus americanus	0	1	0
116960	Eutheria; Laurasiatheria; Carnivora; Caniformia; Ursidae	Ursus arctos horribilis	0	2	0
29073	Eutheria; Laurasiatheria; Carnivora; Caniformia; Ursidae	Ursus maritimus	0	3	0
32536	Eutheria; Laurasiatheria; Carnivora; Feliformia; Felidae; Acinonychinae	Acinonyx jubatus	0	0	0
9685	Eutheria; Laurasiatheria; Carnivora; Feliformia; Felidae; Felinae	Felis catus	0	0	0
9696	Eutheria; Laurasiatheria; Carnivora; Feliformia; Felidae; Felinae	Puma concolor	0	0	0
9691	Eutheria; Laurasiatheria; Carnivora; Feliformia; Felidae; Pantherinae	Panthera pardus	0	0	0
74533	Eutheria; Laurasiatheria; Carnivora; Feliformia; Felidae; Pantherinae	Panthera tigris altaica	0	0	0
310752	Eutheria; Laurasiatheria; Cetartiodactyla; Cetacea; Mysticeti; Balaenopteridae	Balaenoptera acutorostrata scammoni	0	0	0
90247	Eutheria; Laurasiatheria; Cetartiodactyla; Cetacea; Odontoceti; Delphinidae	Lagenorhynchus obliquidens	1	5	1
9733	Eutheria; Laurasiatheria; Cetartiodactyla; Cetacea; Odontoceti; Delphinidae	Orcinus orca	0	1	0
9739	Eutheria; Laurasiatheria; Cetartiodactyla; Cetacea; Odontoceti; Delphinidae	Tursiops truncatus	0	3	0
118797	Eutheria; Laurasiatheria; Cetartiodactyla; Cetacea; Odontoceti; Lipotidae	Lipotes vexillifer	0	0	0
9749	Eutheria; Laurasiatheria; Cetartiodactyla; Cetacea; Odontoceti; Monodontidae	Delphinapterus leucas	0	1	0
1706337	Eutheria; Laurasiatheria; Cetartiodactyla; Cetacea; Odontoceti; Phocoenidae	Neophocaena asiaeorientalis asiaeorientalis	1	1	1
9755	Eutheria; Laurasiatheria; Cetartiodactyla; Cetacea; Odontoceti; Physeteridae	Physeter catodon	3	1	1
59538	Eutheria; Laurasiatheria; Cetartiodactyla; Ruminantia; Pecora; Bovidae; Antilopinae	Pantholops hodgsonii	0	0	0
43346	Eutheria; Laurasiatheria; Cetartiodactyla; Ruminantia; Pecora; Bovidae; Bovinae	Bison bison bison	0	0	0
9915	Eutheria; Laurasiatheria; Cetartiodactyla; Ruminantia; Pecora; Bovidae; Bovinae	Bos indicus	2	0	0
30522	Eutheria; Laurasiatheria; Cetartiodactyla; Ruminantia; Pecora; Bovidae; Bovinae	Bos indicus x Bos taurus	3	0	1
72004	Eutheria; Laurasiatheria; Cetartiodactyla; Ruminantia; Pecora; Bovidae; Bovinae	Bos mutus	0	0	0
9913	Eutheria; Laurasiatheria; Cetartiodactyla; Ruminantia; Pecora; Bovidae; Bovinae	Bos taurus	6	0	0
89462	Eutheria; Laurasiatheria; Cetartiodactyla; Ruminantia; Pecora; Bovidae; Bovinae	Bubalus bubalis	0	0	0
9925	Eutheria; Laurasiatheria; Cetartiodactyla; Ruminantia; Pecora; Bovidae; Caprinae	Capra hircus	0	0	0
9940	Eutheria; Laurasiatheria; Cetartiodactyla; Ruminantia; Pecora; Bovidae; Caprinae	Ovis aries	0	0	0
9880	Eutheria; Laurasiatheria; Cetartiodactyla; Ruminantia; Pecora; Cervidae; Odocoileinae	Odocoileus virginianus texanus	3	0	1
9823	Eutheria; Laurasiatheria; Cetartiodactyla; Suina; Suidae	Sus scrofa	1	0	1
9837	Eutheria; Laurasiatheria; Cetartiodactyla; Tylopoda; Camelidae	Camelus bactrianus	1	0	1
9838	Eutheria; Laurasiatheria; Cetartiodactyla; Tylopoda; Camelidae	Camelus dromedarius	0	0	0
419612	Eutheria; Laurasiatheria; Cetartiodactyla; Tylopoda; Camelidae	Camelus ferus	0	0	0
30538	Eutheria; Laurasiatheria; Cetartiodactyla; Tylopoda; Camelidae	Vicugna pacos	0	0	0
9402	Eutheria; Laurasiatheria; Chiroptera; Megachiroptera; Pteropodidae; Pteropodinae	Pteropus alecto	0	4	0
132908	Eutheria; Laurasiatheria; Chiroptera; Megachiroptera; Pteropodidae; Pteropodinae	Pteropus vampyrus	0	0	0
9407	Eutheria; Laurasiatheria; Chiroptera; Megachiroptera; Pteropodidae; Pteropodinae	Rousettus aegyptiacus	0	1	0
186990	Eutheria; Laurasiatheria; Chiroptera; Microchiroptera; Hipposideridae	Hipposideros armiger	0	0	0
9430	Eutheria; Laurasiatheria; Chiroptera; Microchiroptera; Phyllostomidae; Desmodontinae	Desmodus rotundus	0	0	0
89673	Eutheria; Laurasiatheria; Chiroptera; Microchiroptera; Phyllostomidae; Phyllostominae	Phyllostomus discolor	0	0	0
29078	Eutheria; Laurasiatheria; Chiroptera; Microchiroptera; Vespertilionidae	Eptesicus fuscus	0	0	0
109478	Eutheria; Laurasiatheria; Chiroptera; Microchiroptera; Vespertilionidae	Myotis brandtii	0	0	0
225400	Eutheria; Laurasiatheria; Chiroptera; Microchiroptera; Vespertilionidae	Myotis davidii	0	0	0
59463	Eutheria; Laurasiatheria; Chiroptera; Microchiroptera; Vespertilionidae	Myotis lucifugus	0	0	0
291302	Eutheria; Laurasiatheria; Chiroptera; Microchiroptera; Vespertilionidae; Miniopterinae	Miniopterus natalensis	0	0	0
9365	Eutheria; Laurasiatheria; Eulipotyphla; Erinaceidae; Erinaceinae	Erinaceus europaeus	0	0	0
42254	Eutheria; Laurasiatheria; Eulipotyphla; Soricidae; Soricinae	Sorex araneus	0	0	0
143302	Eutheria; Laurasiatheria; Eulipotyphla; Talpidae	Condylura cristata	0	0	0
9793	Eutheria; Laurasiatheria; Perissodactyla; Equidae	Equus asinus	0	0	0
9796	Eutheria; Laurasiatheria; Perissodactyla; Equidae	Equus caballus	0	0	0
9798	Eutheria; Laurasiatheria; Perissodactyla; Equidae	Equus przewalskii	0	0	0
73337	Eutheria; Laurasiatheria; Perissodactyla; Rhinocerotidae	Ceratotherium simum simum	0	2	0
9974	Eutheria; Laurasiatheria; Pholidota; Manidae	Manis javanica	0	0	0
9361	Eutheria; Xenarthra; Cingulata; Dasypodidae	Dasypus novemcinctus	0	0	0
9305	Metatheria; Dasyuromorphia; Dasyuridae	Sarcophilus harrisii	0	0	0
13616	Metatheria; Didelphimorphia; Didelphidae	Monodelphis domestica	0	0	0
38626	Metatheria; Diprotodontia; Phascolarctidae	Phascolarctos cinereus	0	0	0
29139	Metatheria; Diprotodontia; Vombatidae	Vombatus ursinus	0	0	0
9258	Monotremata; Ornithorhynchidae	Ornithorhynchus anatinus	0	0	0

## Sheet: T1
accession	lineage	species	iso	*	sequence
XP_023396522.1	Eutheria; Afrotheria; Proboscidea; Elephantidae	Loxodonta africana	X3		EDYCTHREALQHPARARAAPGREQVGCECPPGSP
XP_023396528.1	Eutheria; Afrotheria; Proboscidea; Elephantidae	Loxodonta africana	X9	d	EDYCTHREALQHPARARAAPGREQVGCECPPGSP
XP_023396529.1	Eutheria; Afrotheria; Proboscidea; Elephantidae	Loxodonta africana	X10	*	EDYCTHREALQHPARARAAPGREQVGCRDAQSPD
XP_023396534.1	Eutheria; Afrotheria; Proboscidea; Elephantidae	Loxodonta africana	X14	d	EDYCTHREALQHPARARAAPGREQVG--------
XP_021107941.1	Eutheria; Euarchontoglires; Glires; Rodentia; Hystricomorpha; Bathyergidae	Heterocephalus glaber	X2	*	ENHCAHREALQCAARARAAPGGEQVSRGDAQGPD
XP_021107942.1	Eutheria; Euarchontoglires; Glires; Rodentia; Hystricomorpha; Bathyergidae	Heterocephalus glaber	X3		ENHCAHREALQCAARARAAPGGEQVSREFPPSPL
XP_017652765.1	Eutheria; Euarchontoglires; Glires; Rodentia; Myomorpha; Muroidea; Spalacidae; Spalacinae	Nannospalax galili	X1	*	ENHRADREALQCTAHARAAPGREQVCCGDAESPD
XP_017652766.1	Eutheria; Euarchontoglires; Glires; Rodentia; Myomorpha; Muroidea; Spalacidae; Spalacinae	Nannospalax galili	X2	d	ENHRADREALQCTAHARAAPGREQVCCGDAESPD
XP_017652767.1	Eutheria; Euarchontoglires; Glires; Rodentia; Myomorpha; Muroidea; Spalacidae; Spalacinae	Nannospalax galili	X3	d	ENHRADREALQCTAHARAAPGREQVCCGDAESPD
XP_026236842.1	Eutheria; Euarchontoglires; Glires; Rodentia; Sciuromorpha; Sciuridae; Xerinae; Marmotini	Urocitellus parryii	X2	*	ENHRADWEALQRTAHARTAPGGEQVSYGDAQSPH
XP_011902230.1	Eutheria; Euarchontoglires; Primates; Haplorrhini; Catarrhini; Cercopithecidae; Cercopithecinae	Cercocebus atys	X2	*	ENHCADREALQCPSCTRAAPGREQVSCGDAQSPD
XP_011902233.1	Eutheria; Euarchontoglires; Primates; Haplorrhini; Catarrhini; Cercopithecidae; Cercopithecinae	Cercocebus atys	X5		ENHCADREALQCPSCTRAAPGREQVSCVLSQGLA
XP_008017760.1	Eutheria; Euarchontoglires; Primates; Haplorrhini; Catarrhini; Cercopithecidae; Cercopithecinae	Chlorocebus sabaeus	X2	*	ENHCADREALQCPSCTRAAPGREQVRCGDAQSPD
XP_008017762.1	Eutheria; Euarchontoglires; Primates; Haplorrhini; Catarrhini; Cercopithecidae; Cercopithecinae	Chlorocebus sabaeus	X4	d	ENHCADREALQCPSCTRAAPGREQVRCGDAQSPD
XP_005595039.1	Eutheria; Euarchontoglires; Primates; Haplorrhini; Catarrhini; Cercopithecidae; Cercopithecinae	Macaca fascicularis	X2	*	ENHCADREALQCPSCTRAAPGREQVSCGDAQSPD
XP_017712882.1	Eutheria; Euarchontoglires; Primates; Haplorrhini; Catarrhini; Cercopithecidae; Colobinae	Rhinopithecus bieti	X1	*	ENHCADREALQCPACTRASPGREQVSCGDAQSPD
XP_010367505.1	Eutheria; Euarchontoglires; Primates; Haplorrhini; Catarrhini; Cercopithecidae; Colobinae	Rhinopithecus roxellana	X1	*	ENHCADREALQCPACTRASPGREQVSCGDAQSPD
XP_010367507.1	Eutheria; Euarchontoglires; Primates; Haplorrhini; Catarrhini; Cercopithecidae; Colobinae	Rhinopithecus roxellana	X3	d	ENHCADREALQCPACTRASPGREQVSCGDAQSPD
XP_014439114.1	Eutheria; Euarchontoglires; Scandentia; Tupaiidae	Tupaia chinensis	–	*	EDHRADWEALQCPASARATPGGEQVSCGDAQSPD
XP_025718553.1	Eutheria; Laurasiatheria; Carnivora; Caniformia; Otariidae	Callorhinus ursinus	X3	*	ENHRADREALQCSACARTAPGGEQVSCGDAQSSD
XP_027950128.1	Eutheria; Laurasiatheria; Carnivora; Caniformia; Otariidae	Eumetopias jubatus	X3	*	ENHRADREALQCSACARTAPGGEQVSCGDAQSSD
XP_027464001.1	Eutheria; Laurasiatheria; Carnivora; Caniformia; Otariidae	Zalophus californianus	X3	*	ENHRADREALQCSACARTAPGGEQVSCGDAQSSD
XP_027464002.1	Eutheria; Laurasiatheria; Carnivora; Caniformia; Otariidae	Zalophus californianus	X4		ENHRADREALQCSACARTAPGGEQVS--------
XP_021538576.1	Eutheria; Laurasiatheria; Carnivora; Caniformia; Phocidae	Neomonachus schauinslandi	X5		ENHRADREALQCSACARTAPGGEQVGCELSFSPA
XP_021538584.1	Eutheria; Laurasiatheria; Carnivora; Caniformia; Phocidae	Neomonachus schauinslandi	X6	*	ENHRADREALQCSACARTAPGGEQVGCGDAQSSD
XP_019665941.1	Eutheria; Laurasiatheria; Carnivora; Caniformia; Ursidae	Ailuropoda melanoleuca	X1		ENHCADREALQCSACTRTPPDREQVGCELSFSPA
XP_019665942.1	Eutheria; Laurasiatheria; Carnivora; Caniformia; Ursidae	Ailuropoda melanoleuca	X2	*	ENHCADREALQCSACTRTPPDREQVGCGDAQSSD
XP_011236028.1	Eutheria; Laurasiatheria; Carnivora; Caniformia; Ursidae	Ailuropoda melanoleuca	X4		ENHCADREALQCSACTRTPPDREQVGCELSFSPA
XP_019665943.1	Eutheria; Laurasiatheria; Carnivora; Caniformia; Ursidae	Ailuropoda melanoleuca	X5	d	ENHCADREALQCSACTRTPPDREQVGCELSFSPA
XP_026955694.1	Eutheria; Laurasiatheria; Cetartiodactyla; Cetacea; Odontoceti; Delphinidae	Lagenorhynchus obliquidens	X5	*	ENHRADWEALQCPACARAAPGREQVSCGDSQSPD
XP_024601988.1	Eutheria; Laurasiatheria; Cetartiodactyla; Cetacea; Odontoceti; Phocoenidae	Neophocaena asiaeorientalis asiaeorientalis	X2	*	ENHRADWEALQCPACARAAPGREQVSCGDSQSPD
XP_028342714.1	Eutheria; Laurasiatheria; Cetartiodactyla; Cetacea; Odontoceti; Physeteridae	Physeter catodon	X1		ENHRADWEALQRPACARAAPGREQVSCEFSPRPS
XP_028342715.1	Eutheria; Laurasiatheria; Cetartiodactyla; Cetacea; Odontoceti; Physeteridae	Physeter catodon	X2		ENHRADWEALQRPACARAAPGREQVSCQPQSFPS
XP_028342716.1	Eutheria; Laurasiatheria; Cetartiodactyla; Cetacea; Odontoceti; Physeteridae	Physeter catodon	X3	*	ENHRADWEALQRPACARAAPGREQVSCGDSQSPD
XP_019811729.1	Eutheria; Laurasiatheria; Cetartiodactyla; Ruminantia; Pecora; Bovidae; Bovinae	Bos indicus	X1	*	ENHRADWQALQCQACARTAAGREQVSGGDAQSPD
XP_019811730.1	Eutheria; Laurasiatheria; Cetartiodactyla; Ruminantia; Pecora; Bovidae; Bovinae	Bos indicus	X2	d	ENHRADWQALQCQACARTAAGREQVSGGDAQSPD
XP_027389882.1	Eutheria; Laurasiatheria; Cetartiodactyla; Ruminantia; Pecora; Bovidae; Bovinae	Bos indicus x Bos taurus	X1	*	ENHRADWQALQCQACARTAAGREQVSGGDAQSPD
XP_027389883.1	Eutheria; Laurasiatheria; Cetartiodactyla; Ruminantia; Pecora; Bovidae; Bovinae	Bos indicus x Bos taurus	X2	d	ENHRADWQALQCQACARTAAGREQVSGGDAQSPD
XP_027389884.1	Eutheria; Laurasiatheria; Cetartiodactyla; Ruminantia; Pecora; Bovidae; Bovinae	Bos indicus x Bos taurus	X3	d	ENHRADWQALQCQACARTAAGREQVSGGDAQSPD
XP_024844527.1	Eutheria; Laurasiatheria; Cetartiodactyla; Ruminantia; Pecora; Bovidae; Bovinae	Bos taurus	X1	*	ENHRADWQALQCQACARTAAGREQVSGGDAQSPD
XP_024844528.1	Eutheria; Laurasiatheria; Cetartiodactyla; Ruminantia; Pecora; Bovidae; Bovinae	Bos taurus	X2	d	ENHRADWQALQCQACARTAAGREQVSGGDAQSPD
XP_024844529.1	Eutheria; Laurasiatheria; Cetartiodactyla; Ruminantia; Pecora; Bovidae; Bovinae	Bos taurus	X3	d	ENHRADWQALQCQACARTAAGREQVSGGDAQSPD
XP_024844530.1	Eutheria; Laurasiatheria; Cetartiodactyla; Ruminantia; Pecora; Bovidae; Bovinae	Bos taurus	X3	d	ENHRADWQALQCQACARTAAGREQVSGGDAQSPD
XP_024844531.1	Eutheria; Laurasiatheria; Cetartiodactyla; Ruminantia; Pecora; Bovidae; Bovinae	Bos taurus	X4	d	ENHRADWQALQCQACARTAAGREQVSGGDAQSPD
XP_024844533.1	Eutheria; Laurasiatheria; Cetartiodactyla; Ruminantia; Pecora; Bovidae; Bovinae	Bos taurus	X7	d	ENHRADWQALQCQACARTAAGREQVSGGDAQSPD
XP_020749469.1	Eutheria; Laurasiatheria; Cetartiodactyla; Ruminantia; Pecora; Cervidae; Odocoileinae	Odocoileus virginianus texanus	X1	*	ENHRADRQALQCPACARTAAGREQVSSGDAQSPD
XP_020749470.1	Eutheria; Laurasiatheria; Cetartiodactyla; Ruminantia; Pecora; Cervidae; Odocoileinae	Odocoileus virginianus texanus	X2	d	ENHRADRQALQCPACARTAAGREQVSSGDAQSPD
XP_020749471.1	Eutheria; Laurasiatheria; Cetartiodactyla; Ruminantia; Pecora; Cervidae; Odocoileinae	Odocoileus virginianus texanus	X3	d	ENHRADRQALQCPACARTAAGREQVSSGDAQSPD
XP_020936419.1	Eutheria; Laurasiatheria; Cetartiodactyla; Suina; Suidae	Sus scrofa	X1	*	ENHRADRKALQRPARARAAPGREHVCCGDAESPD
XP_010962371.1	Eutheria; Laurasiatheria; Cetartiodactyla; Tylopoda; Camelidae	Camelus bactrianus	X3	*	ENHRADREALQCPARAGAAPGREQVSCGDAQSPD

## Sheet: T2
accession	lineage	species	iso	*	sequence
XP_004414556.1	Eutheria; Laurasiatheria; Carnivora; Caniformia; Odobenidae	Odobenus rosmarus divergens	X1	*	PGPSSPRAAGQPQSFPSGGDAQSSD
XP_006739411.1	Eutheria; Laurasiatheria; Carnivora; Caniformia; Phocidae	Leptonychotes weddellii	X1	*	PGPSSPRAAGQPQSFPSGGDAQSSD
XP_021538555.1	Eutheria; Laurasiatheria; Carnivora; Caniformia; Phocidae	Neomonachus schauinslandi	X1	*	PGPSSPRAAGQPQSFPSGGDAQSSD
	Eutheria; Laurasiatheria; Carnivora; Caniformia; Ursidae	Ursus americanus			PGPGSPRAAVQPQSFPSGGDAQSSD
XP_026344949.1	Eutheria; Laurasiatheria; Carnivora; Caniformia; Ursidae	Ursus arctos horribilis	X1	*	PGPGSPRAAVQPQSFPSGGDAQSSD
XP_026344951.1	Eutheria; Laurasiatheria; Carnivora; Caniformia; Ursidae	Ursus arctos horribilis	X3	d	PGPGSPRAAVQPQSFPSGGDAQSSD
XP_008707438.1	Eutheria; Laurasiatheria; Carnivora; Caniformia; Ursidae	Ursus maritimus	X1	*	PGPGSPRAAVQPQSFPSGGDAQSSD
XP_008707439.1	Eutheria; Laurasiatheria; Carnivora; Caniformia; Ursidae	Ursus maritimus	X2	d	PGPGSPRAAVQPQSFPSGGDAQSSD
XP_008707442.1	Eutheria; Laurasiatheria; Carnivora; Caniformia; Ursidae	Ursus maritimus	X5	d	PGPGSPRAAVQPQSFPSGGDAQSSD
XP_026955689.1	Eutheria; Laurasiatheria; Cetartiodactyla; Cetacea; Odontoceti; Delphinidae	Lagenorhynchus obliquidens	X1	*	PGRSSLRAAGQPQSFPSGGDSQSPD
XP_026955691.1	Eutheria; Laurasiatheria; Cetartiodactyla; Cetacea; Odontoceti; Delphinidae	Lagenorhynchus obliquidens	X2	d	PGRSSLRAAGQPQSFPSGGDSQSPD
XP_026955692.1	Eutheria; Laurasiatheria; Cetartiodactyla; Cetacea; Odontoceti; Delphinidae	Lagenorhynchus obliquidens	X3	d	PGRSSLRAAGQPQSFPSGGDSQSPD
XP_026955693.1	Eutheria; Laurasiatheria; Cetartiodactyla; Cetacea; Odontoceti; Delphinidae	Lagenorhynchus obliquidens	X4	d	PGRSSLRAAGQPQSFPSGGDSQSPD
XP_026955696.1	Eutheria; Laurasiatheria; Cetartiodactyla; Cetacea; Odontoceti; Delphinidae	Lagenorhynchus obliquidens	X7	d	PGRSSLRAAGQPQSFPSGGDSQSPD
XP_012394911.1	Eutheria; Laurasiatheria; Cetartiodactyla; Cetacea; Odontoceti; Delphinidae	Orcinus orca	X1	*	PGRSSLRAAGQPQSFPSGGDSQSPD
XP_019789208.1	Eutheria; Laurasiatheria; Cetartiodactyla; Cetacea; Odontoceti; Delphinidae	Tursiops truncatus	X1	*	PGRSSLRAAGQPQSFPSGGDSQSPD
XP_019789209.1	Eutheria; Laurasiatheria; Cetartiodactyla; Cetacea; Odontoceti; Delphinidae	Tursiops truncatus	X2	d	PGRSSLRAAGQPQSFPSGGDSQSPD
XP_019789212.1	Eutheria; Laurasiatheria; Cetartiodactyla; Cetacea; Odontoceti; Delphinidae	Tursiops truncatus	X5	d	PGRSSLRAAGQPQSFPSGGDSQSPD
XP_022422323.1	Eutheria; Laurasiatheria; Cetartiodactyla; Cetacea; Odontoceti; Monodontidae	Delphinapterus leucas	X1	*	PGRSSLRAAGQPQSFPSGGDSQSPD
XP_024601987.1	Eutheria; Laurasiatheria; Cetartiodactyla; Cetacea; Odontoceti; Phocoenidae	Neophocaena asiaeorientalis asiaeorientalis	X1	*	PGRSSLRAAGQPQSFPSGGDSQSPD
XP_028342714.1	Eutheria; Laurasiatheria; Cetartiodactyla; Cetacea; Odontoceti; Physeteridae	Physeter catodon	X1	*	PGRSSLRAAGQPQSFPSGGDSQSPD
XP_024904983.1	Eutheria; Laurasiatheria; Chiroptera; Megachiroptera; Pteropodidae; Pteropodinae	Pteropus alecto	X1	*	PGQRPLRTAGQPQSFPSGGDAQSPD
XP_024904984.1	Eutheria; Laurasiatheria; Chiroptera; Megachiroptera; Pteropodidae; Pteropodinae	Pteropus alecto	X3	d	PGQRPLRTAGQPQSFPSGGDAQSPD
XP_024904985.1	Eutheria; Laurasiatheria; Chiroptera; Megachiroptera; Pteropodidae; Pteropodinae	Pteropus alecto	X4	d	PGQRPLRTAGQPQSFPSGGDAQSPD
XP_024904986.1	Eutheria; Laurasiatheria; Chiroptera; Megachiroptera; Pteropodidae; Pteropodinae	Pteropus alecto	X4	d	PGQRPLRTAGQPQSFPSGGDAQSPD
XP_015979168.1	Eutheria; Laurasiatheria; Chiroptera; Megachiroptera; Pteropodidae; Pteropodinae	Rousettus aegyptiacus	X1	*	PGQRSLRAAGQPQSFPSGGDAQSPD
XP_014653014.1	Eutheria; Laurasiatheria; Perissodactyla; Rhinocerotidae	Ceratotherium simum simum	X1	*	PGRSSLRAAAQPQSFPSGGDAESPD
XP_014653016.1	Eutheria; Laurasiatheria; Perissodactyla; Rhinocerotidae	Ceratotherium simum simum	X4	d	PGRSSLRAAAQPQSFPSGGDAESPD

## Sheet: E5
accession	lineage	species	iso	*	sequence
XP_023396538.1	Eutheria; Afrotheria; Proboscidea; Elephantidae	Loxodonta africana	X20		GEPLPREGSFFQAENEREGIIDMDKHVPGVEEIRVKLKNVGDG
XP_004598924.1	Eutheria; Euarchontoglires; Glires; Lagomorpha; Ochotonidae	Ochotona princeps	X1		GELGSRGQLEGQTIPDTGLKLNGAGKEREQGDG
XP_004598926.1	Eutheria; Euarchontoglires; Glires; Lagomorpha; Ochotonidae	Ochotona princeps	X2		GELGSRGQLEGQTIPDTGLKLNGAGKEREQGDG
XP_020040773.1	Eutheria; Euarchontoglires; Glires; Rodentia; Castorimorpha; Castoridae	Castor canadensis	X9		-AEFFQTENEGIGVLNTSKHVPDAGKRLNKGNG
XP_011902235.1	Eutheria; Euarchontoglires; Primates; Haplorrhini; Catarrhini; Cercopithecidae; Cercopithecinae	Cercocebus atys	X7		GAEFFQAENEEKGVLDTGRHMPGAGERREKGDG
XP_008017768.1	Eutheria; Euarchontoglires; Primates; Haplorrhini; Catarrhini; Cercopithecidae; Cercopithecinae	Chlorocebus sabaeus	X10		GAEFFQAENEEKGVLDTGRHMPGAGERREKGDG
XP_005595037.1	Eutheria; Euarchontoglires; Primates; Haplorrhini; Catarrhini; Cercopithecidae; Cercopithecinae	Macaca fascicularis	X4		GAEFFQAENEEKGVLDTGRHMPGAGERREKGDG
XP_014983954.1	Eutheria; Euarchontoglires; Primates; Haplorrhini; Catarrhini; Cercopithecidae; Cercopithecinae	Macaca mulatta	X6		GAEFFQAENEEKGVLDTGRHMPGAGERREKGDG
XP_011716097.1	Eutheria; Euarchontoglires; Primates; Haplorrhini; Catarrhini; Cercopithecidae; Cercopithecinae	Macaca nemestrina	X2		GAEFFQAENEEKGVLDTGRHMPGAGEGREKGDG
XP_011828343.1	Eutheria; Euarchontoglires; Primates; Haplorrhini; Catarrhini; Cercopithecidae; Cercopithecinae	Mandrillus leucophaeus	X1		GAEFFQAENEEKGVLDTGRHMPGAGERREKGDG
XP_011828344.1	Eutheria; Euarchontoglires; Primates; Haplorrhini; Catarrhini; Cercopithecidae; Cercopithecinae	Mandrillus leucophaeus	X2		GAEFFQAENEEKGVLDTGRHMPGAGERREKGDG
NP_001162274.1	Eutheria; Euarchontoglires; Primates; Haplorrhini; Catarrhini; Cercopithecidae; Cercopithecinae	Papio anubis	–		EAEFFQAENEEKGVLDTGRHMPGAGERREKGDG
XP_025227574.1	Eutheria; Euarchontoglires; Primates; Haplorrhini; Catarrhini; Cercopithecidae; Cercopithecinae	Theropithecus gelada	X1		GAEFFQAENEEKGVLDTGRHMPGAGERREKGDG
XP_025227575.1	Eutheria; Euarchontoglires; Primates; Haplorrhini; Catarrhini; Cercopithecidae; Cercopithecinae	Theropithecus gelada	X2		GAEFFQAENEEKGVLDTGRHMPGAGERREKGDG
XP_017712885.1	Eutheria; Euarchontoglires; Primates; Haplorrhini; Catarrhini; Cercopithecidae; Colobinae	Rhinopithecus bieti	X4		GDRIFQAENEGKGVLDTGRHMPGAGERREKGDG
XP_018874440.1	Eutheria; Euarchontoglires; Primates; Haplorrhini; Catarrhini; Hominidae	Gorilla gorilla gorilla	X1		GAEFFQAENEGKGVPDTGRHMPGAGKRREKGDG
NP_000107.1	Eutheria; Euarchontoglires; Primates; Haplorrhini; Catarrhini; Hominidae	Homo sapiens	1	*	GAEFFQAENEGKGVLDTGRHMPGAGKRREKGDG
NP_851829.1	Eutheria; Euarchontoglires; Primates; Haplorrhini; Catarrhini; Hominidae	Homo sapiens	3	d	GAEFFQAENEGKGVLDTGRHMPGAGKRREKGDG
NP_001290394.1	Eutheria; Euarchontoglires; Primates; Haplorrhini; Catarrhini; Hominidae	Homo sapiens	5	d	GAEFFQAENEGKGVLDTGRHMPGAGKRREKGDG
XP_006724899.1	Eutheria; Euarchontoglires; Primates; Haplorrhini; Catarrhini; Hominidae	Homo sapiens	X1	d	GAEFFQAENEGKGVLDTGRHMPGAGKRREKGDG
XP_006724904.1	Eutheria; Euarchontoglires; Primates; Haplorrhini; Catarrhini; Hominidae	Homo sapiens	X8	d	GAEFFQAENEGKGVLDTGRHMPGAGKRREKGDG
XP_011529493.1	Eutheria; Euarchontoglires; Primates; Haplorrhini; Catarrhini; Hominidae	Homo sapiens	X10	d	GAEFFQAENEGKGVLDTGRHMPGAGKRREKGDG
XP_016885253.1	Eutheria; Euarchontoglires; Primates; Haplorrhini; Catarrhini; Hominidae	Homo sapiens	X11	d	GAEFFQAENEGKGVLDTGRHMPGAGKRREKGDG
XP_008950930.1	Eutheria; Euarchontoglires; Primates; Haplorrhini; Catarrhini; Hominidae	Pan paniscus	X1	d	GAEFFQAENEGKGVLDTGRHMPGAGKRREKGDG
XP_003806387.1	Eutheria; Euarchontoglires; Primates; Haplorrhini; Catarrhini; Hominidae	Pan paniscus	X3	d	GAEFFQAENEGKGVLDTGRHMPGAGKRREKGDG
XP_008950945.1	Eutheria; Euarchontoglires; Primates; Haplorrhini; Catarrhini; Hominidae	Pan paniscus	X4	d	GAEFFQAENEGKGVLDTGRHMPGAGKRREKGDG
XP_003806389.1	Eutheria; Euarchontoglires; Primates; Haplorrhini; Catarrhini; Hominidae	Pan paniscus	X5	d	GAEFFQAENEGKGVLDTGRHMPGAGKRREKGDG
NP_001009011.1	Eutheria; Euarchontoglires; Primates; Haplorrhini; Catarrhini; Hominidae	Pan troglodytes	–	d	GAEFFQAENEGKGVLDTGRHMPGAGKRREKGDG
XP_024208719.1	Eutheria; Euarchontoglires; Primates; Haplorrhini; Catarrhini; Hominidae	Pan troglodytes	X1		GAEFFQAENEGKGVLDTGRHMPGAGKRREKASPGFQPARSSQHWLQKEGGDG
XP_024208720.1	Eutheria; Euarchontoglires; Primates; Haplorrhini; Catarrhini; Hominidae	Pan troglodytes	X2		GAEFFQAENEGKGVLDTGRHMPGAGKRREKASPGFQPARSSQHWLQKEGGDG
XP_024208721.1	Eutheria; Euarchontoglires; Primates; Haplorrhini; Catarrhini; Hominidae	Pan troglodytes	X3		GAEFFQAENEGKGVLDTGRHMPGAGKRREKASPGFQPARSSQHWLQKEGGDG
XP_016798102.1	Eutheria; Euarchontoglires; Primates; Haplorrhini; Catarrhini; Hominidae	Pan troglodytes	X4	d	GAEFFQAENEGKGVLDTGRHMPGAGKRREKGDG
XP_016798104.1	Eutheria; Euarchontoglires; Primates; Haplorrhini; Catarrhini; Hominidae	Pan troglodytes	X6	d	GAEFFQAENEGKGVLDTGRHMPGAGKRREKGDG
XP_016798105.1	Eutheria; Euarchontoglires; Primates; Haplorrhini; Catarrhini; Hominidae	Pan troglodytes	X7	d	GAEFFQAENEGKGVLDTGRHMPGAGKRREKGDG
XP_024208722.1	Eutheria; Euarchontoglires; Primates; Haplorrhini; Catarrhini; Hominidae	Pan troglodytes	X12		GAEFFQAENEGKGVLDTGRHMPGAGKRREKASPGFQPARSSQHWLQKEGGDG
XP_024096398.1	Eutheria; Euarchontoglires; Primates; Haplorrhini; Catarrhini; Hominidae	Pongo abelii	X4		GAEFFQPENEGKGVLDTGRHMPGAGKRREKGDG
XP_024096399.1	Eutheria; Euarchontoglires; Primates; Haplorrhini; Catarrhini; Hominidae	Pongo abelii	X5		GAEFFQPENEGKGVLDTGRHMPGAGKRREKGDG
XP_024096400.1	Eutheria; Euarchontoglires; Primates; Haplorrhini; Catarrhini; Hominidae	Pongo abelii	X6		GAEFFQPENEGKGVLDTGRHMPGAGKRREKGDG
XP_012668654.1	Eutheria; Euarchontoglires; Primates; Strepsirrhini; Lorisiformes; Galagidae	Otolemur garnettii	X2		GAEVSQAEIVGKGVLNMGKHMPGAGEIRQKGDG
XP_025789713.1	Eutheria; Laurasiatheria; Carnivora; Feliformia; Felidae; Felinae	Puma concolor	X1		EIEHLKQAPHQQRGILSTCGHMKGSAEERDGGDG
XP_028023114.1	Eutheria; Laurasiatheria; Cetartiodactyla; Cetacea; Mysticeti; Balaenopteridae	Balaenoptera acutorostrata scammoni	–		G--FFQGEYERKGILDTGXHVADTGEVRDKGDG
XP_005965185.1	Eutheria; Laurasiatheria; Cetartiodactyla; Ruminantia; Pecora; Bovidae; Antilopinae	Pantholops hodgsonii	X1		GLGFFPAEYERQGILDPGSTVLGQPRLMEETFSLAGDG
XP_005965186.1	Eutheria; Laurasiatheria; Cetartiodactyla; Ruminantia; Pecora; Bovidae; Antilopinae	Pantholops hodgsonii	X2		GLGFFPAEYERQGILDPGSTVLGQPRLMEETFSLAGDG
XP_028378742.1	Eutheria; Laurasiatheria; Chiroptera; Microchiroptera; Phyllostomidae; Phyllostominae	Phyllostomus discolor	X2		GAAFSPAEYERKSILDTGEHLPGTGEVIDKGDG
XP_028378743.1	Eutheria; Laurasiatheria; Chiroptera; Microchiroptera; Phyllostomidae; Phyllostominae	Phyllostomus discolor	X3		GAAFSPAEYERKSILDTGEHLPGTGEVIDKGDG
XP_028378745.1	Eutheria; Laurasiatheria; Chiroptera; Microchiroptera; Phyllostomidae; Phyllostominae	Phyllostomus discolor	X5		GAAFSPAEYERKSILDTGEHLPGTGEVIDKGDG

## Sheet: lineages
genus	lineage
Acinonyx	Eutheria; Laurasiatheria; Carnivora; Feliformia; Felidae; Acinonychinae
Ailuropoda	Eutheria; Laurasiatheria; Carnivora; Caniformia; Ursidae
Aotus	Eutheria; Euarchontoglires; Primates; Haplorrhini; Platyrrhini; Aotidae
Balaenoptera	Eutheria; Laurasiatheria; Cetartiodactyla; Cetacea; Mysticeti; Balaenopteridae
Bison	Eutheria; Laurasiatheria; Cetartiodactyla; Ruminantia; Pecora; Bovidae; Bovinae
Bos	Eutheria; Laurasiatheria; Cetartiodactyla; Ruminantia; Pecora; Bovidae; Bovinae
Bubalus	Eutheria; Laurasiatheria; Cetartiodactyla; Ruminantia; Pecora; Bovidae; Bovinae
Callithrix	Eutheria; Euarchontoglires; Primates; Haplorrhini; Platyrrhini; Cebidae; Callitrichinae; Callithrix
Callorhinus	Eutheria; Laurasiatheria; Carnivora; Caniformia; Otariidae
Camelus	Eutheria; Laurasiatheria; Cetartiodactyla; Tylopoda; Camelidae
Canis	Eutheria; Laurasiatheria; Carnivora; Caniformia; Canidae
Capra	Eutheria; Laurasiatheria; Cetartiodactyla; Ruminantia; Pecora; Bovidae; Caprinae
Carlito	Eutheria; Euarchontoglires; Primates; Haplorrhini; Tarsiiformes; Tarsiidae
Castor	Eutheria; Euarchontoglires; Glires; Rodentia; Castorimorpha; Castoridae
Cavia	Eutheria; Euarchontoglires; Glires; Rodentia; Hystricomorpha; Caviidae
Cebus	Eutheria; Euarchontoglires; Primates; Haplorrhini; Platyrrhini; Cebidae; Cebinae
Ceratotherium	Eutheria; Laurasiatheria; Perissodactyla; Rhinocerotidae
Cercocebus	Eutheria; Euarchontoglires; Primates; Haplorrhini; Catarrhini; Cercopithecidae; Cercopithecinae
Cervus	Eutheria; Laurasiatheria; Cetartiodactyla; Ruminantia; Pecora; Cervidae; Cervinae
Chinchilla	Eutheria; Euarchontoglires; Glires; Rodentia; Hystricomorpha; Chinchillidae
Chlorocebus	Eutheria; Euarchontoglires; Primates; Haplorrhini; Catarrhini; Cercopithecidae; Cercopithecinae
Chrysochloris	Eutheria; Afrotheria; Chrysochloridae; Chrysochlorinae
Colobus	Eutheria; Euarchontoglires; Primates; Haplorrhini; Catarrhini; Cercopithecidae; Colobinae
Condylura	Eutheria; Laurasiatheria; Eulipotyphla; Talpidae
Cricetulus	Eutheria; Euarchontoglires; Glires; Rodentia; Myomorpha; Muroidea; Cricetidae; Cricetinae
Dasypus	Eutheria; Xenarthra; Cingulata; Dasypodidae
Delphinapterus	Eutheria; Laurasiatheria; Cetartiodactyla; Cetacea; Odontoceti; Monodontidae
Desmodus	Eutheria; Laurasiatheria; Chiroptera; Microchiroptera; Phyllostomidae; Desmodontinae
Dipodomys	Eutheria; Euarchontoglires; Glires; Rodentia; Castorimorpha; Heteromyidae; Dipodomyinae
Echinops	Eutheria; Afrotheria; Tenrecidae; Tenrecinae
Elephantulus	Eutheria; Afrotheria; Macroscelidea; Macroscelididae
Enhydra	Eutheria; Laurasiatheria; Carnivora; Caniformia; Mustelidae; Lutrinae
Eptesicus	Eutheria; Laurasiatheria; Chiroptera; Microchiroptera; Vespertilionidae
Equus	Eutheria; Laurasiatheria; Perissodactyla; Equidae
Erinaceus	Eutheria; Laurasiatheria; Eulipotyphla; Erinaceidae; Erinaceinae
Erythrocebus	Eutheria; Euarchontoglires; Primates; Haplorrhini; Catarrhini; Cercopithecidae; Cercopithecinae
Eumetopias	Eutheria; Laurasiatheria; Carnivora; Caniformia; Otariidae
Felis	Eutheria; Laurasiatheria; Carnivora; Feliformia; Felidae; Felinae
Fukomys	Eutheria; Euarchontoglires; Glires; Rodentia; Hystricomorpha; Bathyergidae
Galeopterus	Eutheria; Euarchontoglires; Dermoptera; Cynocephalidae
Gorilla	Eutheria; Euarchontoglires; Primates; Haplorrhini; Catarrhini; Hominidae
Heterocephalus	Eutheria; Euarchontoglires; Glires; Rodentia; Hystricomorpha; Bathyergidae
Hipposideros	Eutheria; Laurasiatheria; Chiroptera; Microchiroptera; Hipposideridae
Homo	Eutheria; Euarchontoglires; Primates; Haplorrhini; Catarrhini; Hominidae
Ictidomys	Eutheria; Euarchontoglires; Glires; Rodentia; Sciuromorpha; Sciuridae; Xerinae; Marmotini
Jaculus	Eutheria; Euarchontoglires; Glires; Rodentia; Myomorpha; Dipodoidea; Dipodidae; Dipodinae
Lagenorhynchus	Eutheria; Laurasiatheria; Cetartiodactyla; Cetacea; Odontoceti; Delphinidae
Leptonychotes	Eutheria; Laurasiatheria; Carnivora; Caniformia; Phocidae
Lipotes	Eutheria; Laurasiatheria; Cetartiodactyla; Cetacea; Odontoceti; Lipotidae
Loxodonta	Eutheria; Afrotheria; Proboscidea; Elephantidae
Macaca	Eutheria; Euarchontoglires; Primates; Haplorrhini; Catarrhini; Cercopithecidae; Cercopithecinae
Mandrillus	Eutheria; Euarchontoglires; Primates; Haplorrhini; Catarrhini; Cercopithecidae; Cercopithecinae
Manis	Eutheria; Laurasiatheria; Pholidota; Manidae
Marmota	Eutheria; Euarchontoglires; Glires; Rodentia; Sciuromorpha; Sciuridae; Xerinae; Marmotini
Meriones	Eutheria; Euarchontoglires; Glires; Rodentia; Myomorpha; Muroidea; Muridae; Gerbillinae
Mesocricetus	Eutheria; Euarchontoglires; Glires; Rodentia; Myomorpha; Muroidea; Cricetidae; Cricetinae
Microcebus	Eutheria; Euarchontoglires; Primates; Strepsirrhini; Lemuriformes; Cheirogaleidae
Microtus	Eutheria; Euarchontoglires; Glires; Rodentia; Myomorpha; Muroidea; Cricetidae; Arvicolinae
Miniopterus	Eutheria; Laurasiatheria; Chiroptera; Microchiroptera; Vespertilionidae; Miniopterinae
Monodelphis	Metatheria; Didelphimorphia; Didelphidae
Mus	Eutheria; Euarchontoglires; Glires; Rodentia; Myomorpha; Muroidea; Muridae; Murinae
Mustela	Eutheria; Laurasiatheria; Carnivora; Caniformia; Mustelidae; Mustelinae
Myotis	Eutheria; Laurasiatheria; Chiroptera; Microchiroptera; Vespertilionidae
Nannospalax	Eutheria; Euarchontoglires; Glires; Rodentia; Myomorpha; Muroidea; Spalacidae; Spalacinae
Neomonachus	Eutheria; Laurasiatheria; Carnivora; Caniformia; Phocidae
Neophocaena	Eutheria; Laurasiatheria; Cetartiodactyla; Cetacea; Odontoceti; Phocoenidae
Neovison	Eutheria; Laurasiatheria; Carnivora; Caniformia; Mustelidae; Mustelinae
Nomascus	Eutheria; Euarchontoglires; Primates; Haplorrhini; Catarrhini; Hylobatidae
Ochotona	Eutheria; Euarchontoglires; Glires; Lagomorpha; Ochotonidae
Octodon	Eutheria; Euarchontoglires; Glires; Rodentia; Hystricomorpha; Octodontidae
Odobenus	Eutheria; Laurasiatheria; Carnivora; Caniformia; Odobenidae
Odocoileus	Eutheria; Laurasiatheria; Cetartiodactyla; Ruminantia; Pecora; Cervidae; Odocoileinae
Orcinus	Eutheria; Laurasiatheria; Cetartiodactyla; Cetacea; Odontoceti; Delphinidae
Ornithorhynchus	Monotremata; Ornithorhynchidae
Orycteropus	Eutheria; Afrotheria; Tubulidentata; Orycteropodidae
Oryctolagus	Eutheria; Euarchontoglires; Glires; Lagomorpha; Leporidae
Otolemur	Eutheria; Euarchontoglires; Primates; Strepsirrhini; Lorisiformes; Galagidae
Ovis	Eutheria; Laurasiatheria; Cetartiodactyla; Ruminantia; Pecora; Bovidae; Caprinae
Pan	Eutheria; Euarchontoglires; Primates; Haplorrhini; Catarrhini; Hominidae
Panthera	Eutheria; Laurasiatheria; Carnivora; Feliformia; Felidae; Pantherinae
Pantholops	Eutheria; Laurasiatheria; Cetartiodactyla; Ruminantia; Pecora; Bovidae; Antilopinae
Papio	Eutheria; Euarchontoglires; Primates; Haplorrhini; Catarrhini; Cercopithecidae; Cercopithecinae
Peromyscus	Eutheria; Euarchontoglires; Glires; Rodentia; Myomorpha; Muroidea; Cricetidae; Neotominae
Phascolarctos	Metatheria; Diprotodontia; Phascolarctidae
Phyllostomus	Eutheria; Laurasiatheria; Chiroptera; Microchiroptera; Phyllostomidae; Phyllostominae
Physeter	Eutheria; Laurasiatheria; Cetartiodactyla; Cetacea; Odontoceti; Physeteridae
Piliocolobus	Eutheria; Euarchontoglires; Primates; Haplorrhini; Catarrhini; Cercopithecidae; Colobinae
Pongo	Eutheria; Euarchontoglires; Primates; Haplorrhini; Catarrhini; Hominidae
Prolemur	Eutheria; Euarchontoglires; Primates; Strepsirrhini; Lemuriformes; Lemuridae
Propithecus	Eutheria; Euarchontoglires; Primates; Strepsirrhini; Lemuriformes; Indriidae
Pteropus	Eutheria; Laurasiatheria; Chiroptera; Megachiroptera; Pteropodidae; Pteropodinae
Puma	Eutheria; Laurasiatheria; Carnivora; Feliformia; Felidae; Felinae
Rattus	Eutheria; Euarchontoglires; Glires; Rodentia; Myomorpha; Muroidea; Muridae; Murinae
Rhinopithecus	Eutheria; Euarchontoglires; Primates; Haplorrhini; Catarrhini; Cercopithecidae; Colobinae
Rousettus	Eutheria; Laurasiatheria; Chiroptera; Megachiroptera; Pteropodidae; Pteropodinae
Saimiri	Eutheria; Euarchontoglires; Primates; Haplorrhini; Platyrrhini; Cebidae; Saimiriinae
Sarcophilus	Metatheria; Dasyuromorphia; Dasyuridae
Sorex	Eutheria; Laurasiatheria; Eulipotyphla; Soricidae; Soricinae
Sus	Eutheria; Laurasiatheria; Cetartiodactyla; Suina; Suidae
Theropithecus	Eutheria; Euarchontoglires; Primates; Haplorrhini; Catarrhini; Cercopithecidae; Cercopithecinae
Trichechus	Eutheria; Afrotheria; Sirenia; Trichechidae
Tupaia	Eutheria; Euarchontoglires; Scandentia; Tupaiidae
Tursiops	Eutheria; Laurasiatheria; Cetartiodactyla; Cetacea; Odontoceti; Delphinidae
Urocitellus	Eutheria; Euarchontoglires; Glires; Rodentia; Sciuromorpha; Sciuridae; Xerinae; Marmotini
Ursus	Eutheria; Laurasiatheria; Carnivora; Caniformia; Ursidae
Vicugna	Eutheria; Laurasiatheria; Cetartiodactyla; Tylopoda; Camelidae
Vombatus	Metatheria; Diprotodontia; Vombatidae
Vulpes	Eutheria; Laurasiatheria; Carnivora; Caniformia; Canidae
Zalophus	Eutheria; Laurasiatheria; Carnivora; Caniformia; Otariidae
